# Supplementary material for: Detection, Characterization and Sequencing of BTV Serotypes Circulating in Cuba in 2022
Source: MDPI journal article supplement (doi:10.3390/v16010164), 2024-01-22
Supplement: s1 [file s1]

**Supplementary Figures. Phylogenetic analysis of the Cuban strains of BTV, segments 1, 3, 4, 5, 7, 8, 9 and 10.**

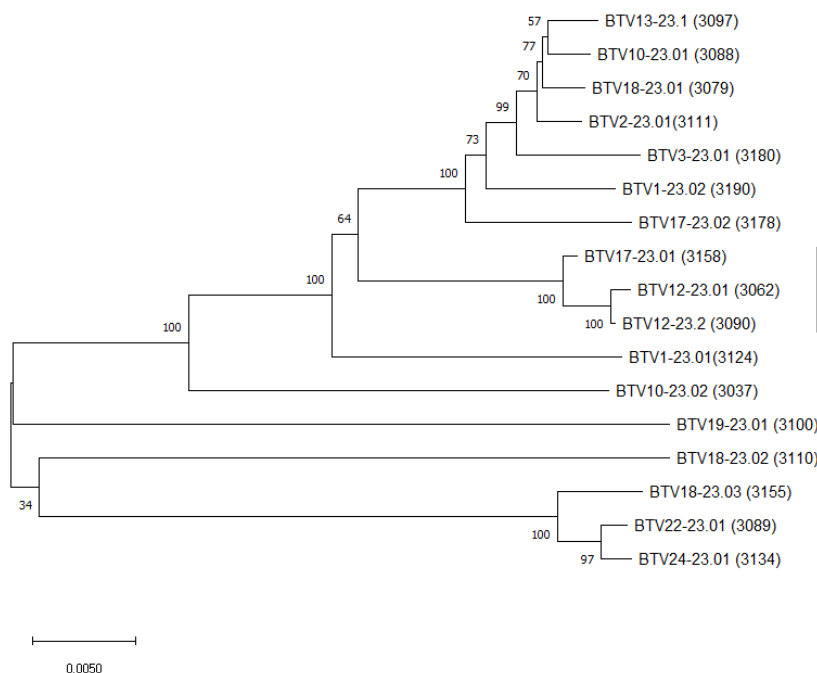

**Figure S1: Phylogenetic analysis of S1 sequences of the Cuban BTV strains.** Phylogenetic analysis of S1 sequences of BTV strains using the Maximum Likelihood method and Tamura-Nei model (1000 replicates). This analysis involved 17 nucleotide sequences; there were a total of 3944 positions in the final dataset. In the phylogenetic tree, GenBank sequences, species designations and strain names are given. Brackets include sequences sharing more than 98% of nucleotide identity.

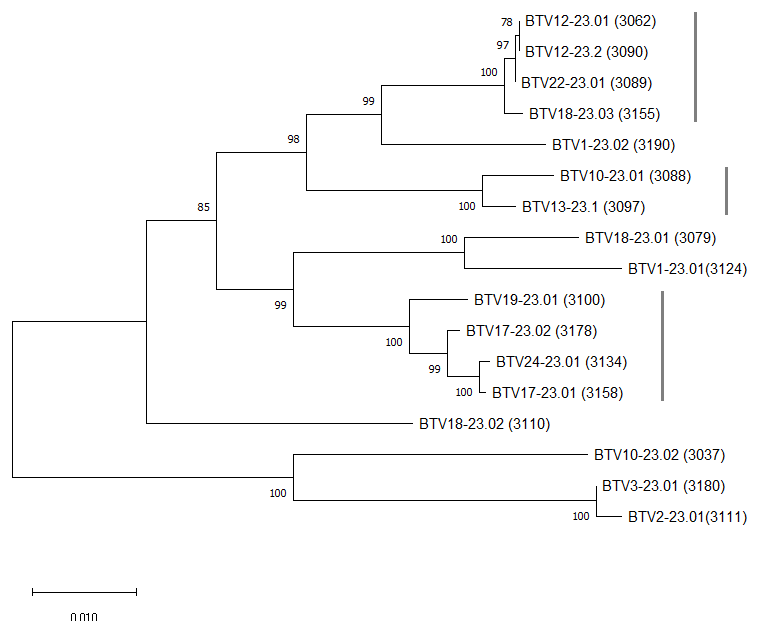

**Figure S2: Phylogenetic analysis of S3 sequences of the Cuban BTV strains.** Phylogenetic analysis of S1 sequences of BTV strains using the Maximum Likelihood method and Tamura-Nei model (1000 replicates). This analysis involved 17 nucleotide sequences, there were a total of 2772 positions in the final dataset. In the phylogenetic tree, GenBank sequences, species designations and strain names are given. Brackets include sequences sharing more than 98% of nucleotide identity.

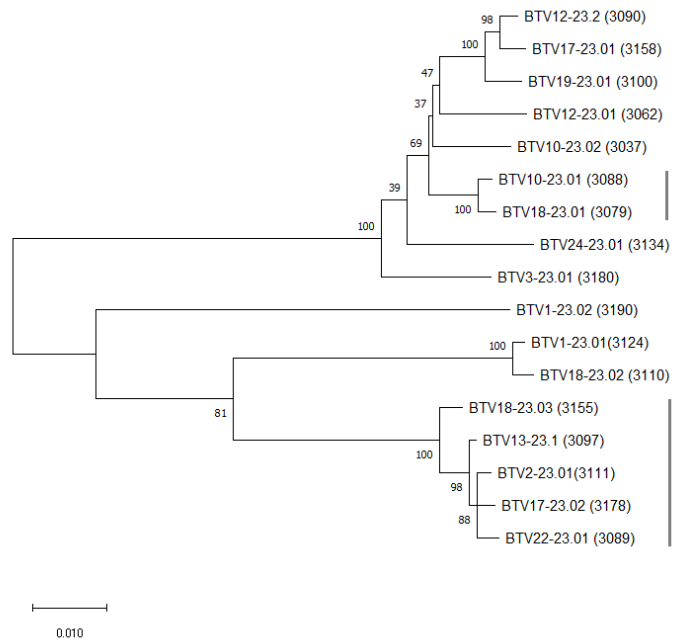

**Figure S3: Phylogenetic analysis of S4 sequences of the Cuban BTV strains.** Phylogenetic analysis of S4 sequences of BTV strains using the Maximum Likelihood method and Tamura-Nei model (1000 replicates). This analysis involved 17 nucleotide sequences, there were a total of 1981 positions in the final dataset. In the phylogenetic tree, GenBank sequences, species designations and strain names are given. Brackets include sequences sharing more than 98% of nucleotide identity.

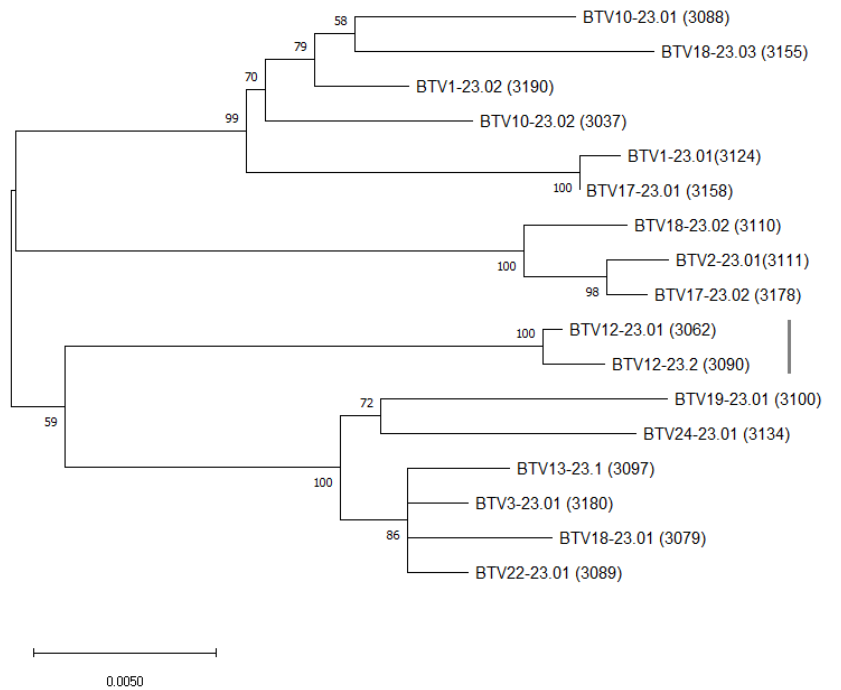

**Figure S4: Phylogenetic analysis of S5 sequences of the Cuban BTV strains.** Phylogenetic analysis of S5 sequences of BTV strains using the Maximum Likelihood method and Tamura-Nei model (1000 replicates). This analysis involved 17 nucleotide sequences, there were a total of 1771 positions in the final dataset. In the phylogenetic tree, GenBank sequences, species designations and strain names are given. Brackets include sequences sharing more than 98% of nucleotide identity.

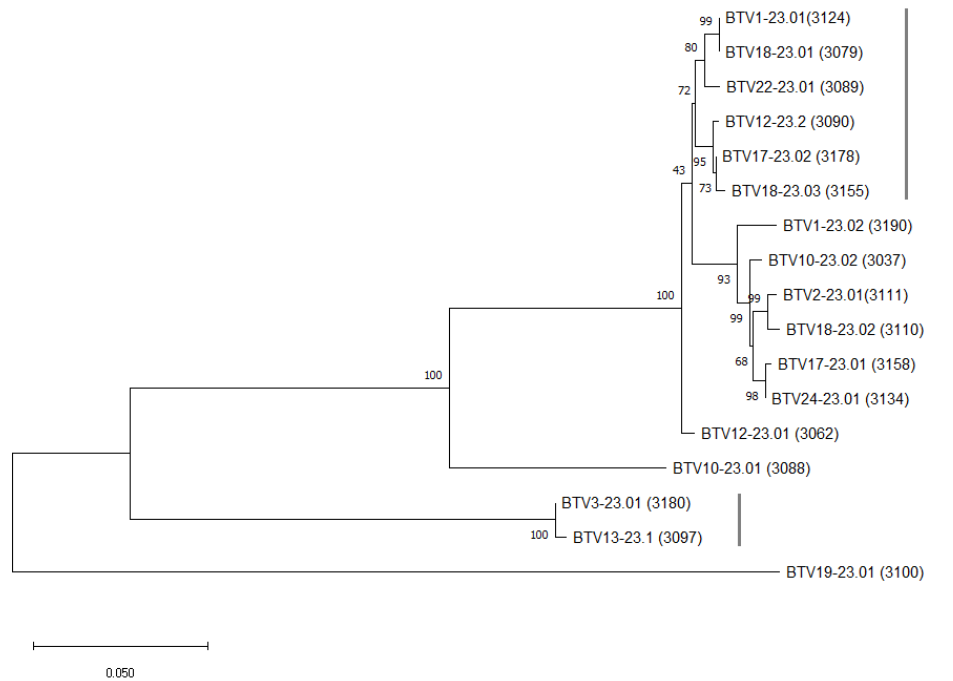

**Figure S5: Phylogenetic analysis of S7 sequences of the Cuban BTV strains.** Phylogenetic analysis of S8 sequences of BTV strains using the Maximum Likelihood method and Tamura-Nei model (1000 replicates). This analysis involved 17 nucleotide sequences, there were a total of 1159 positions in the final dataset. In the phylogenetic tree, GenBank sequences, species designations and strain names are given. Brackets include sequences sharing more than 98% of nucleotide identity.

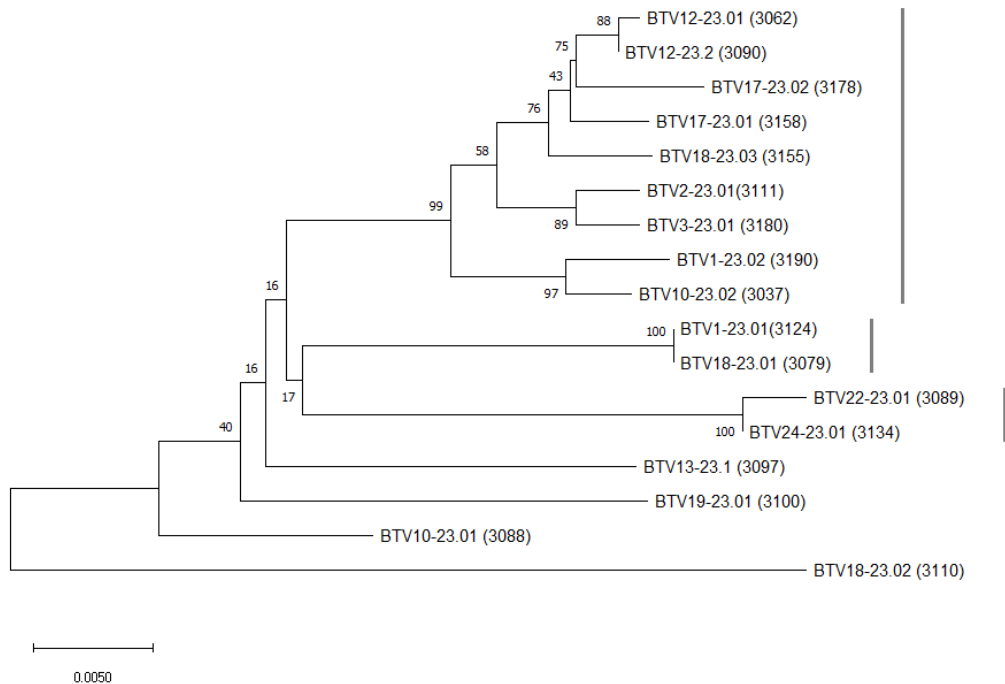

**Figure S6: Phylogenetic analysis of S8 sequences of the Cuban BTV strains.** Phylogenetic analysis of S8 sequences of BTV strains using the Maximum Likelihood method and Tamura-Nei model (1000 replicates). This analysis involved 17 nucleotide sequences, there were a total of 1125 positions in the final dataset. In the phylogenetic tree, GenBank sequences, species designations and strain names are given. Brackets include sequences sharing more than 98% of nucleotide identity.

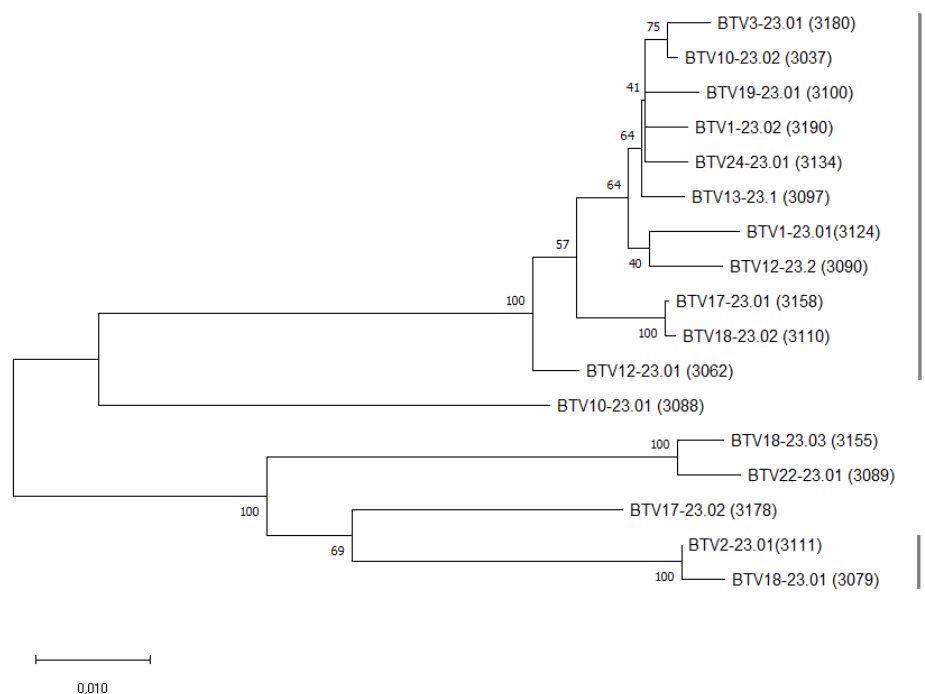

**Figure S7: Phylogenetic analysis of S9 sequences of the Cuban BTV strains.** Phylogenetic analysis of S8 sequences of BTV strains using the Maximum Likelihood method and Tamura-Nei model (1000 replicates). This analysis involved 17 nucleotide sequences, there were a total of 1050 positions in the final dataset. In the phylogenetic tree, GenBank sequences, species designations and strain names are given. Brackets include sequences sharing more than 98% of nucleotide identity.

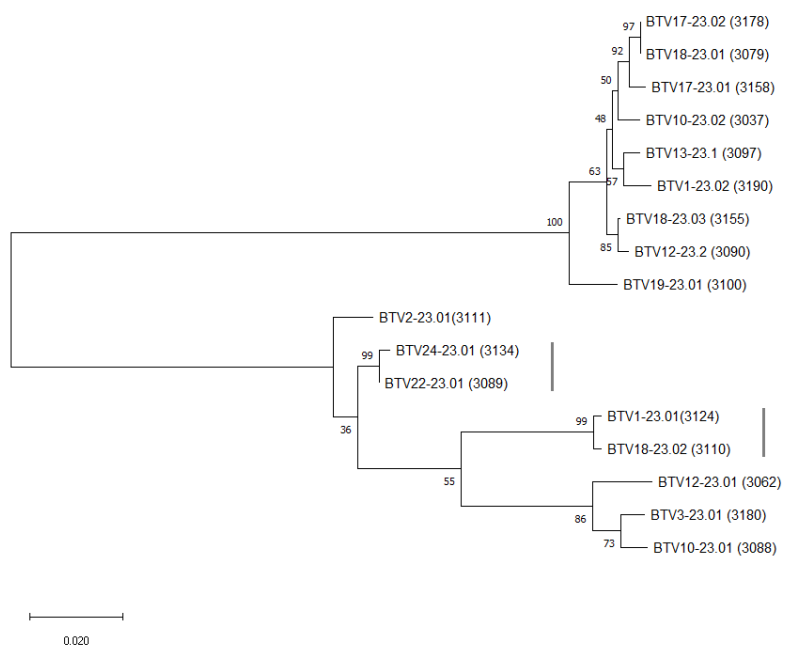

**Figure S8: Phylogenetic analysis of S10 sequences of the Cuban BTV strains.** Phylogenetic analysis of S8 sequences of BTV strains using the Maximum Likelihood method and Tamura-Nei model (1000 replicates). This analysis involved 17 nucleotide sequences, there were a total of 822 positions in the final dataset. In the phylogenetic tree, GenBank sequences, species designations and strain names are given. Brackets include sequences sharing more than 98% of nucleotide identity.
